# Supplementary material
Source: PubMed Central journal article supplement (PMC8248924)
Supplement: mmc1.pdf [file mmc1.pdf]

# THE LANCET

## Microbe

### Supplementary appendix

This appendix formed part of the original submission. We post it as supplied by the authors.

Supplement to: Manesh A, Varghese GM, on behalf of the CENDRIC Investigators and Collaborators. Rising antimicrobial resistance: an evolving epidemic in a pandemic. *Lancet Microbe* 2021; published online July 1. [https://doi.org/10.1016/S2666-5247\(21\)00173-7](https://doi.org/10.1016/S2666-5247(21)00173-7).

**\*CENDRIC Investigators:**

|                              |                                                                                  |
|------------------------------|----------------------------------------------------------------------------------|
| Dr. M. Vivekanandan          | Jawaharlal Institute of Postgraduate Medical Education & Research,<br>Puducherry |
| Dr. Mukta Wyawahare          | Jawaharlal Institute of Postgraduate Medical Education & Research,<br>Puducherry |
| Dr. Apurba Sankar Sastry     | Jawaharlal Institute of Postgraduate Medical Education & Research,<br>Puducherry |
| Dr. Bhuvana Krishna          | St. John's Medical College, Bengaluru                                            |
| Dr. Mary Dias                | St. John's Medical College, Bengaluru                                            |
| Dr. Savitha Nagaraj          | St. John's Medical College, Bengaluru                                            |
| Dr. Aaron Lobo               | St. John's Medical College, Bengaluru                                            |
| Dr. Sanjeev K Singh          | Amrita Institute of Medical Science, Kochi                                       |
| Dr Anil Kumar                | Amrita Institute of Medical Science, Kochi                                       |
| Dr Dipu T S                  | Amrita Institute of Medical Science, Kochi                                       |
| Dr Merlin Moni               | Amrita Institute of Medical Science, Kochi                                       |
| Dr. Ram Gopalakrishnan       | Apollo Hospital, Chennai                                                         |
| Dr. V Ramasubramanian        | Apollo Hospital, Chennai                                                         |
| Dr. Senthur Nambi            | Apollo Hospital, Chennai                                                         |
| Dr. Nandini Sethuraman       | Apollo Hospital, Chennai                                                         |
| Dr. Prasanta R<br>Mohapatra  | All India Institute of Medical Sciences, Bhubaneswar                             |
| Dr. Baijayantimala<br>Mishra | All India Institute of Medical Sciences, Bhubaneswar                             |
| Dr. Swagata Tripathy         | All India Institute of Medical Sciences, Bhubaneswar                             |
| Dr. Prabodha Kumar Das       | All India Institute of Medical Sciences, Bhubaneswar                             |
| Dr. Sanjay Bhattacharya      | Tata Medical Center, Kolkata                                                     |
| Dr. Mammen Chandy            | Tata Medical Center, Kolkata                                                     |
| Dr. Ravi Kirti               | All India Institute of Medical Sciences, Patna                                   |
| Dr. Bhaskar Thakuria         | All India Institute of Medical Sciences, Patna                                   |
| Dr Divendu Bhushan           | All India Institute of Medical Sciences, Patna                                   |
| Dr Basab Bagchi              | All India Institute of Medical Sciences, Patna                                   |
| Dr Abhyuday Kumar            | All India Institute of Medical Sciences, Patna                                   |
| Dr. Camilla Rodrigues        | P. D. Hinduja National Hospital & Medical Research Centre, Mumbai                |
| Dr. Ayesha Sunavala          | P. D. Hinduja National Hospital & Medical Research Centre, Mumbai                |
| Dr. Anjali Shetty            | P. D. Hinduja National Hospital & Medical Research Centre, Mumbai                |
| Dr. Yatin Mehta              | Medanta Hospital, Delhi                                                          |
| Dr. Nitin Sood               | Medanta Hospital, Delhi                                                          |
| Dr. Vikas Deswal             | Medanta Hospital, Delhi                                                          |
| Dr. Neha Gupta               | Medanta Hospital, Delhi                                                          |
| Dr. Sakib Burza              | Doctors Without Borders, New Delhi                                               |
| Dr. William Robertson        | Doctors Without Borders, New Delhi                                               |
| Dr. Biju George              | Christian Medical College, Vellore                                               |
| Dr. Binila Chacko            | Christian Medical College, Vellore                                               |
| Dr. Subramani K              | Christian Medical College, Vellore                                               |
| Dr. Balaji V                 | Christian Medical College, Vellore                                               |

|                       |                                    |
|-----------------------|------------------------------------|
| Dr. Anand Zachariah   | Christian Medical College, Vellore |
| Dr. Abi Manesh        | Christian Medical College, Vellore |
| Dr. George M Varghese | Christian Medical College, Vellore |

**\*CENDRIC International Collaborators:**

|                                  |                                                                                                                            |
|----------------------------------|----------------------------------------------------------------------------------------------------------------------------|
| Dr. Nicholas PJ Day              | Mahidol Oxford Tropical Medicine Research Unit, Thailand                                                                   |
| Dr. Timothy Jinks                | Wellcome Trust, UK                                                                                                         |
| Dr. Hsu Li Yang                  | National University of Singapore                                                                                           |
| Dr. Leo Yee-Sin                  | National Centre for Infectious Diseases, Singapore                                                                         |
| Dr. David Lye                    | National Centre for Infectious Diseases, Singapore                                                                         |
| Dr. Paul Anantharajah<br>Tambyah | National University Hospital, Singapore                                                                                    |
| Dr. Guy Thwaites                 | Oxford University Clinical Research Unit, Viet Nam<br>Lao-Oxford-Mahosot Hospital-Wellcome Trust Research Unit,<br>Lao PDR |
| Dr. Elizabeth Ashley             |                                                                                                                            |
| Dr. Paul Turner                  | Cambodia-Oxford Medical Research Unit, Cambodia                                                                            |
| Dr. Susanna Dunachie             | University of Oxford, UK                                                                                                   |
| Dr. David Paterson               | The University of Queensland Centre for Clinical Research                                                                  |
